# Supplementary material for: Pre-treatment Strategies for Value Addition in Poultry Litter
Source: PubMed Central journal article supplement (PMC7261907; doi:10.3389/fbioe.2020.00477), 2020-05-25
Supplement: Data_Sheet_1.pdf [file Data_Sheet_1.pdf]

Supplementary data

Manuscript: Pre-treatment strategies for value addition in poultry litter

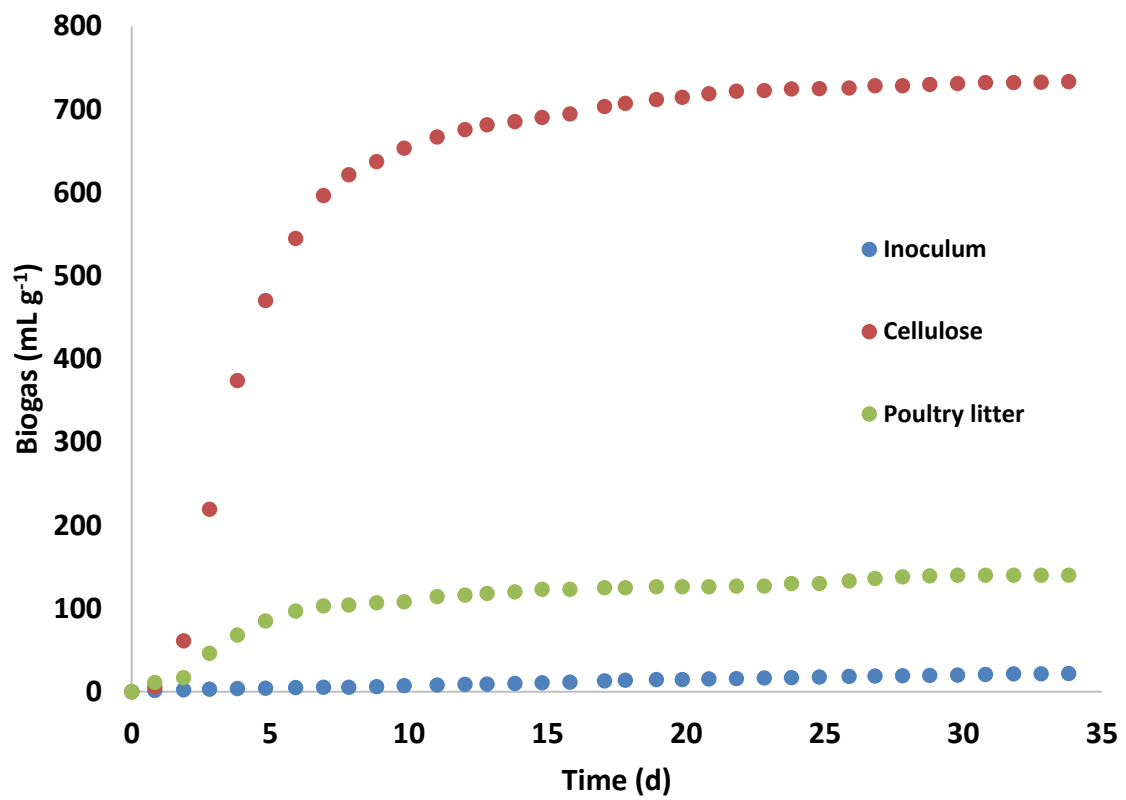

**Figure A.** Profile of cumulative biogas observed for inoculum (negative control or “blank” – blue points), microcristaline cellulose (positive control – red points) and crude poultry litter (sample without pretreatment).

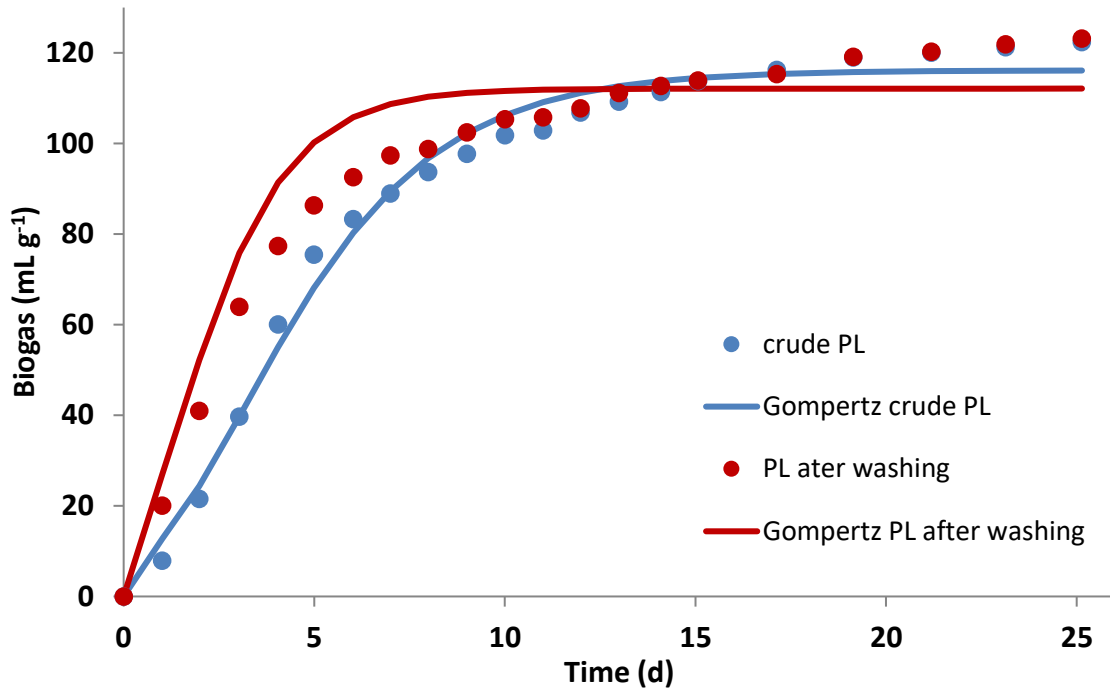

**Figure B.** Profile of cumulative biogas observed for exploratory experimente after PL washing process. Crude PL: blue points; PL after washing: red points; Gompertz model adjusted to crude PL data: blue line; Gompertz model adjusted to data from PL after washing: red line.

**Table A.** The kinetics parameters using Gompertz model for PL crude and after washing exploratory experiment. Where: A = maximum BPP,  $r_m$  = maximum biogas production rate,  $r_m$  day = day of occurrence of the maximum biogas production rate,  $\lambda$  = lag phase and  $R^2$  = determination coefficient. The means followed by the same letters in the columns do not differ statistically by the Tukey test (5%).

| Treatment     | A<br>(mL g <sup>-1</sup> ) | $r_m$<br>(mL g <sup>-1</sup> d <sup>-1</sup> ) | $r_m$ day<br>(d)       | $\lambda$<br>(d)       | $R^2$           |
|---------------|----------------------------|------------------------------------------------|------------------------|------------------------|-----------------|
| Crude PL      | 116.0 ± 24.1 <sup>a</sup>  | 15.8 ± 1.0 <sup>b</sup>                        | 3.2 ± 0.6 <sup>d</sup> | 0.5 ± 0.2 <sup>f</sup> | 0.9955 ± 0.0083 |
| After washing | 113.1 ± 2.8 <sup>a</sup>   | 25.6 ± 2.2 <sup>c</sup>                        | 1.6 ± 0.2 <sup>e</sup> | 0.0 ± 0.0 <sup>g</sup> | 0.9391 ± 0.0209 |
